# Supplementary material for: Serum milk fat globule-EGF factor 8 protein as a potential biomarker for metabolic syndrome
Source: PubMed Central journal article supplement — Clin Mol Hepatol. 2021 Feb 15;27(3):463–73. doi: 10.3350/cmh.2020.0351 (PMC8273636; doi:10.3350/cmh.2020.0351), 2021-02-15
Supplement: cmh-2020-0351-suppl1.pdf [file cmh-2020-0351-suppl1.pdf]

**Supplementary Table 1.** Characteristics at follow-up of subjects without metabolic syndrome at baseline according to the groups classified by serum MFG-E8 level

| Variable                             | Group 1 (n=264, 82.5%) | Group 2 (n=56, 17.5%) | P-value |
|--------------------------------------|------------------------|-----------------------|---------|
| Age (years)                          | 55.6±6.1               | 55.8±6.4              | 0.804   |
| Waist circumference (cm)             | 84.9±8.2               | 85.5±8.3              | 0.626   |
| Body mass index (kg/m <sup>2</sup> ) | 25.0±2.9               | 25.0±3.5              | 0.905   |
| Alcohol drinking                     | 150 (56.8)             | 31 (55.4)             | 0.841   |
| Current smoker                       | 99 (37.5)              | 18 (32.1)             | 0.450   |
| Systolic blood pressure (mmHg)       | 123.6±13.7             | 125.1±15.4            | 0.437   |
| Diastolic blood pressure (mmHg)      | 78.9±10.0              | 81.7±10.2             | 0.033   |
| Total cholesterol (mg/dL)            | 196.5±35.5             | 208.1±40.8            | 0.024   |
| LDL-cholesterol (mg/dL)              | 129.4±40.4             | 138.6±38.4            | 0.057   |
| HDL-cholesterol (mg/dL)              | 56.1±14.6              | 51.7±9.6              | 0.002   |
| Triglyceride (mg/dL)                 | 112.0±72.5             | 160.1±134.0           | <0.001  |
| Glucose (mg/dL)                      | 96.4±15.8              | 97.8±19.7             | 0.500   |
| Creatinine (mg/dL)                   | 0.80±0.15              | 0.82±0.15             | 0.394   |
| High sensitivity CRP (mg/dL)         | 1.09±1.08              | 1.13±1.25             | 0.888   |
| Apolipoprotein AI (mg/dL)            | 78.3±24.3              | 79.0±20.4             | 0.702   |
| Pulse wave velocity (m/s)            | 13.5±2.3               | 14.3±2.5              | 0.026   |

Values are presented as mean±standard deviation or number (%).

Group 1, serum MFG-E8 level <4,745.1 pg/mL; and group 2, serum MFG-E8 level ≥4,745.1 pg/mL.

MFG-E8, milk fat globule-EGF factor 8 protein; LDL, low-density lipoprotein; HDL, high-density lipoprotein; CRP, C-reactive protein.
