# Supplementary material for: Serum milk fat globule-EGF factor 8 protein as a potential biomarker for metabolic syndrome
Source: PubMed Central journal article supplement — Clin Mol Hepatol. 2021 Feb 15;27(3):463–73. doi: 10.3350/cmh.2020.0351 (PMC8273636; doi:10.3350/cmh.2020.0351), 2021-02-15
Supplement: cmh-2020-0351-suppl2.pdf [file cmh-2020-0351-suppl2.pdf]

**Supplementary Table 2.** Baseline characteristics of the study subjects according to the changes of the presence of metabolic syndrome

| Variable                        | Subjects without metabolic syndrome (n=198, 35.6%) | Subjects who developed metabolic syndrome at follow-up (n=122, 21.9%) | Subjects with disappeared metabolic syndrome at follow-up (n=72, 12.9%) | Subjects with sustained metabolic syndrome (n=164, 29.5%) | P-value |
|---------------------------------|----------------------------------------------------|-----------------------------------------------------------------------|-------------------------------------------------------------------------|-----------------------------------------------------------|---------|
| Age (years)                     | 56.2±5.6                                           | 54.6±6.8                                                              | 54.5±7.0                                                                | 54.3±7.0                                                  | 0.020   |
| Male                            | 83 (41.9)                                          | 50 (41.0)                                                             | 40 (55.6)                                                               | 104 (63.4)                                                | <0.001  |
| Waist circumference (cm)        | 84.1±7.3                                           | 86.5±8.0                                                              | 89.8±6.6                                                                | 92.6±6.4                                                  | <0.001  |
| BMI (kg/m <sup>2</sup> )        | 24.8±2.7                                           | 25.3±3.1                                                              | 26.2±2.5                                                                | 27.1±2.6                                                  | <0.001  |
| Systolic blood pressure (mmHg)  | 123.9±13.9                                         | 123.7±12.8                                                            | 132.0±13.2                                                              | 132.4±13.5                                                | <0.001  |
| Diastolic blood pressure (mmHg) | 78.9±9.3                                           | 80.2±8.6                                                              | 85.4±8.2                                                                | 84.4±8.9                                                  | <0.001  |
| Total cholesterol (mg/dL)       | 198.9±35.0                                         | 198.0±34.9                                                            | 192.9±30.6                                                              | 200.0±34.5                                                | 0.521   |
| LDL-cholesterol (mg/dL)         | 130.5±32.8                                         | 131.7±33.2                                                            | 122.0±30.7                                                              | 125.6±34.6                                                | 0.124   |
| HDL-cholesterol (mg/dL)         | 57.4±12.4                                          | 51.9±10.4                                                             | 47.9±12.7                                                               | 45.6±10.8                                                 | <0.001  |
| Triglyceride (mg/dL)            | 113.2±47.8                                         | 132.1±54.8                                                            | 175.2±68.4                                                              | 221.7±122.7                                               | <0.001  |
| Glucose (mg/dL)                 | 95.7±15.4                                          | 98.3±11.6                                                             | 102.9±12.7                                                              | 107.9±25.9                                                | <0.001  |
| Creatinine (mg/dL)              | 0.81±0.15                                          | 0.80±0.16                                                             | 0.83±0.16                                                               | 0.86±0.16                                                 | 0.005   |
| High sensitivity CRP (mg/dL)    | 0.94±1.33                                          | 1.36±2.46                                                             | 1.76±3.59                                                               | 1.37±2.76                                                 | 0.072   |
| Apolipoprotein AI (mg/dL)       | 78.4±15.2                                          | 78.3±15.4                                                             | 76.7±16.7                                                               | 75.5±16.4                                                 | 0.283   |
| MFG-E8 (pg/mL)                  | 3,636.4±1,315.3                                    | 4,029.0±1,321.9                                                       | 4,440.6±1,476.3                                                         | 4,885.0±2,239.5                                           | <0.001  |
| Pulse wave velocity (m/s)       | 13.7±2.1                                           | 13.7±2.4                                                              | 14.3±2.0                                                                | 14.1±2.0                                                  | <0.001  |

Values are presented as mean±standard deviation or number (%).

BMI, body mass index; LDL, low-density lipoprotein; HDL, high-density lipoprotein; CRP, C-reactive protein; MFG-E8, milk fat globule-EGF factor 8 protein.
